# Supplementary material
Source: PubMed Central journal article supplement (PMC3197701)
Supplement: NIHMS311219-supplement-Supp_Fig_S1___Table_S1-S5.pdf [file NIHMS311219-supplement-Supp_Fig_S1___Table_S1-S5.pdf]

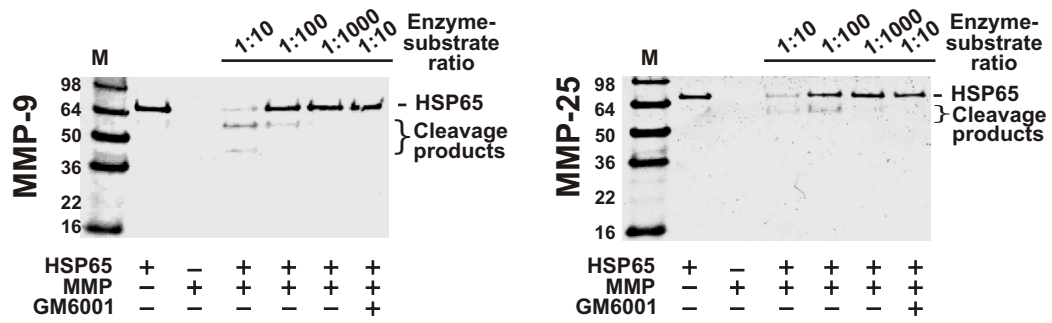

**Supplemental Figure S1.** *In vitro* cleavage of HSP65 by MMP-9 and MMP-25. HSP65 was co-incubated with the indicated amounts of MMPs. The digested samples were analyzed Western blotting with the HSP65 antibody. Where indicated, GM6001 (50  $\mu$ M) was added to the reactions to block MMP activity.

**Supplemental Table S1.** MMP proteolysis of HSP65 and a MALDI-TOF MS analysis of the digest fragments. The arrows indicate the scissile bonds.

| MMP-2 fragments                 |                                                                                                                                                                                                                                                             |                              |                              |                                    |                              |                              |          |
|---------------------------------|-------------------------------------------------------------------------------------------------------------------------------------------------------------------------------------------------------------------------------------------------------------|------------------------------|------------------------------|------------------------------------|------------------------------|------------------------------|----------|
| MAKTIAYDEE <sup>10</sup>        | ARRGLERGLN <sup>20</sup>                                                                                                                                                                                                                                    | ALADAVK ↓ VTL <sup>30</sup>  | GPKGRNVVLE <sup>40</sup>     | KKWGAPITITN <sup>50</sup>          | DGVSIAKEIE <sup>60</sup>     | LEDPYEKIGA <sup>70</sup>     |          |
| EL ↓ VKEVAKKT <sup>80</sup>     | DDVAGDGTTT <sup>90</sup>                                                                                                                                                                                                                                    | ATVLA ↓ QALVR <sup>100</sup> | EGLRNVAAGA <sup>110</sup>    | NPLG ↓ LKRGIE <sup>120</sup>       | KAVEKVTETL <sup>130</sup>    | LKGAKEVETK <sup>140</sup>    |          |
| EQIAATAA ↓ IS <sup>150</sup>    | AGDQSIGD ↓ LI <sup>160</sup>                                                                                                                                                                                                                                | AEAMDKVGNE <sup>170</sup>    | GVITVEESNT <sup>180</sup>    | FG ↓ LQ ↓ LELTE ↓ G <sup>190</sup> | MRFDKGYISG <sup>200</sup>    | Y ↓ FVTDPERQE <sup>210</sup> |          |
| AVLEDPYILL <sup>220</sup> ↓     | VSSKVST ↓ VKD <sup>230</sup>                                                                                                                                                                                                                                | LLPLL ↓ EKVIG <sup>240</sup> | AGKPLLI IAE <sup>250</sup>   | D ↓ VEGEALSTL <sup>260</sup>       | VVNKIRGTFK <sup>270</sup>    | SVAVKAPGFG <sup>280</sup>    |          |
| DRRKAMLQDM <sup>290</sup>       | AILTGGQVIS <sup>300</sup>                                                                                                                                                                                                                                   | EEVGLTLENA <sup>310</sup>    | DLSL ↓ LGKARK <sup>320</sup> | VVTKDETTI <sup>330</sup>           | VEGAGDTDAI <sup>340</sup>    | AGRVAQ ↓ IRQE <sup>350</sup> |          |
| IENSDSDYDR <sup>360</sup>       | EKLQERLAK ↓ L <sup>370</sup>                                                                                                                                                                                                                                | AGGV ↓ AVIKAG <sup>380</sup> | AATEVELKER <sup>390</sup>    | KHRIEDAVRN <sup>400</sup> ↓        | AKA ↓ AVEEGIV <sup>410</sup> | AGGGVTL ↓ LQA <sup>420</sup> |          |
| APTLDELKLE <sup>430</sup>       | GDEATGANIV <sup>440</sup>                                                                                                                                                                                                                                   | KVALEAPLK ↓ Q <sup>450</sup> | IAFNGLPEG <sup>460</sup>     | VVAEK ↓ VRNLP <sup>470</sup>       | AGHGLNAQTG <sup>480</sup>    | VYED ↓ LLAAGV <sup>490</sup> |          |
| ADP ↓ VK ↓ VTRSA <sup>500</sup> | LQNAASIAGL <sup>510</sup>                                                                                                                                                                                                                                   | FLTTEAVVAD <sup>520</sup>    | KPEKEKASVP <sup>530</sup>    | GGGDMGGMDF <sup>540</sup>          |                              |                              |          |
| Peptide sequences               |                                                                                                                                                                                                                                                             |                              |                              |                                    |                              | Molecular mass, Da           |          |
|                                 |                                                                                                                                                                                                                                                             |                              |                              |                                    |                              | Calculated                   | Measured |
| 1                               | <sup>236</sup> EKVIGAGKPLLI I AEDVEGEALSTLVVNKIRGTFKSVAVKAPGFGDRRKAMLQDMA I LTGGQV I SEEVGLTLENADLSLLGKARKVVVTKDETTIVEGAGDTDAIAGRVAQIRQEIENSDSDYDREKLQERLAKLAGGVAVIKAGAATEVELKERKHRIEDAVRNAKAAVEEGIVAGGGVTL LQAAPTLDELKLEGDEATGANIVKVALEAPLK <sup>449</sup> |                              |                              |                                    |                              | 22458                        | 22470    |
| 2                               | <sup>404</sup> AVEEGIVAGGGVTL LQAAPTLDELKLEGDEATGANIVKVALEAPLKQ I AFNGLPEGVVAEKVRNLPAGHGLNAQTGVYEDLLAAGVADPVKVTRSA LQNAASIAGLFLTTEAVVADKPEKEKASVPGGGDMGGMDF <sup>540</sup>                                                                                  |                              |                              |                                    |                              | 13753                        | 13757    |
| 3                               | <sup>202</sup> VTDPERQEAVLEDPYILLVSSKVSTVKD L LPLLLEKVIGAGKPLLI I AEDVEGEALSTLVVNKIRGTFKSVAVKAPGFGDRRKAMLQDMA I LTGGQV I SEEVGLTLENADLSL <sup>314</sup>                                                                                                     |                              |                              |                                    |                              | 12096                        | 12089    |
| 4                               | <sup>347</sup> IRQEIENSDSDYDREKLQERLAKLAGGVAVIKAGAATEVELKERKHRIEDAVRNAKAAVEEGIVAGGGVTL LQAAPTLDELKLEGDEATGANIVKVALEAPLK <sup>449</sup>                                                                                                                      |                              |                              |                                    |                              | 10938                        | 10945    |
| 5                               | <sup>370</sup> LAGGVAVIKAGAATEVELKERKHRIEDAVRNAKAAVEEGIVAGGGVTL LQAAPTLDELKLEGDEATGANIVKVALEAPLKQ I AFNGLPEGVVAEK <sup>465</sup>                                                                                                                            |                              |                              |                                    |                              | 9761                         | 9753     |
| 6                               | <sup>96</sup> ATVLAQALVREGLRNVAAGANPLGLKRGIEKAVEKVTETLLKGAKEVETKEQIAATAA I SAGDQSIGDLIAEAMDKVGNEGVI TVEESNTFGLQ <sup>184</sup>                                                                                                                              |                              |                              |                                    |                              | 9228                         | 9219     |
| 7                               | <sup>28</sup> VTLGPKGRNVVLEKKWGAPITITNDGVSIAKEIELEDPYEKIGAELVKEVAKKTDDVAGDGTTTATVLAQALVREGLRNVAAGANPLG <sup>114</sup>                                                                                                                                       |                              |                              |                                    |                              | 9035                         | 9023     |
| 8                               | <sup>149</sup> ISAGDQSIGDLIAEAMDKVGNEGVI TVEESNTFGLQLELTEGMRFDKGYISGYFVTDPERQEAVLEDPYILLVSSKVST <sup>227</sup>                                                                                                                                              |                              |                              |                                    |                              | 8583                         | 8573     |
| 9                               | <sup>418</sup> LQAAPTLDELKLEGDEATGANIVKVALEAPLKQ I AFNGLPEGVVAEKVRNLPAGHGLNAQTGVYEDLLAAGVADPVK <sup>495</sup><br><sup>115</sup> LKRGIEKAVEKVTETLLKGAKEVETKEQIAATAA I SAGDQSIGDLIAEAMDKVGNEGVI TVEESNTFGLQLELTEG <sup>190</sup>                              |                              |                              |                                    |                              | 7983                         | 7992     |
| 10                              | <sup>73</sup> VKEVAKKTDDVAGDGTTTATVLAQALVREGLRNVAAGANPLGLKRGIEKAVEKVTETLLKGAKEVETKEQIAATAA <sup>148</sup><br><sup>312</sup> LSLLGKARKVVVTKDETTIVEGAGDTDAIAGRVAQIRQEIENSDSDYDREKLQERLAKLAGGVAVIKAGA <sup>381</sup>                                           |                              |                              |                                    |                              | 7810                         | 7809     |
| 11                              | <sup>347</sup> IRQEIENSDSDYDREKLQERLAKLAGGVAVIKAGAATEVELKERKHRIEDAVRN <sup>400</sup>                                                                                                                                                                        |                              |                              |                                    |                              | 6116                         | 6117     |
| 12                              | <sup>485</sup> LLAAGVADPVKVTRSA LQNAASIAGLFLTTEAVVADKPEKEKASVPGGGDMGGMDF <sup>540</sup>                                                                                                                                                                     |                              |                              |                                    |                              | 5570                         | 5579     |
| 13                              | <sup>202</sup> VAVIKAGAATEVELKERKHRIEDAVRNAKAAVEEGIVAGGGVTL LQAAPTLDE <sup>251</sup>                                                                                                                                                                        |                              |                              |                                    |                              | 5472                         | 5468     |
| 14                              | <sup>418</sup> LQAAPTLDELKLEGDEATGANIVKVALEAPLKQ I AFNGLPEGVVAEK <sup>465</sup>                                                                                                                                                                             |                              |                              |                                    |                              | 4957                         | 4959     |

|    |                                                                                |      |      |
|----|--------------------------------------------------------------------------------|------|------|
| 15 | <sup>494</sup> VKVTR <sup>540</sup> SALQNAASIAGLFLTTEAVVADKPEKEKASVPGGGDMGGMDF | 4762 | 4761 |
| 16 | <sup>159</sup> LIAEAMDKVGN <sup>201</sup> EGVITVEESNTFGLQLELTEGMRFDKGYISGY     | 4723 | 4723 |
| 17 | <sup>374</sup> VAVIKAGAATEVELKERKHRIE <sup>417</sup> DAVRNAKAAVEEGIVAGGGVTL    | 4524 | 4525 |
| 18 | <sup>183</sup> LQLELTEGMRFDKGYISGYFVTDPERQEAVLEDPYILL <sup>220</sup>           | 4447 | 4438 |
| 19 | <sup>73</sup> VKEVAKKTDDVAGDGT <sup>114</sup> TTATVLAQALVREGLRNVAAGANPLG       | 4176 | 4186 |

MMP-8 fragments

|                                |                                 |                                 |                                 |                                 |                              |                                 |
|--------------------------------|---------------------------------|---------------------------------|---------------------------------|---------------------------------|------------------------------|---------------------------------|
| MAKTIAYDEE <sup>10</sup>       | ARRGLERGLN <sup>20</sup>        | ALADA ↓ VK ↓ VTL <sup>30</sup>  | GPKGRNVVLE <sup>40</sup>        | KKWGAPTITN <sup>50</sup>        | DGVSIAKEIE <sup>60</sup>     | LEDPYEKIGA <sup>70</sup>        |
| E ↓ L ↓ VKEVAKKT <sup>80</sup> | DDVAGDGTTT <sup>90</sup>        | ATVLA ↓ QA ↓ LVR <sup>100</sup> | EGLRN ↓ VAA ↓ GA <sup>110</sup> | NPLG ↓ LKRGIE <sup>120</sup>    | KAVEK ↓ VTETL <sup>130</sup> | LKGAKEVETK <sup>140</sup>       |
| EQIAATAA ↓ IS <sup>150</sup>   | AGD ↓ QSIGD ↓ LI <sup>160</sup> | AE ↓ A ↓ MDKVGNE <sup>170</sup> | GVITVEESNT <sup>180</sup>       | FGLQ ↓ LELTEG <sup>190</sup> ↓  | MRFDKGYISG <sup>200</sup>    | Y ↓ FVTDPER ↓ QE <sup>210</sup> |
| AVLEDPYIL ↓ L <sup>220</sup> ↓ | VSSKVSTVKD <sup>230</sup>       | LLP ↓ LLEKVI <sup>240</sup>     | AGKP ↓ LLIIAE <sup>250</sup>    | D ↓ VEGEALST ↓ L <sup>260</sup> | VVVK ↓ IRGTFK <sup>270</sup> | SVAVKAPGFG <sup>280</sup>       |
| DRRKAMLQD ↓ M <sup>290</sup>   | AILTGGQVIS <sup>300</sup>       | EEVGLTLENA <sup>310</sup>       | D ↓ LSLGKARK <sup>320</sup> ↓   | VVVTKDETTI <sup>330</sup>       | VEGAGDTDAI <sup>340</sup>    | AGR ↓ VAQIRQE <sup>350</sup>    |
| IENSDDYDR <sup>360</sup>       | EKLQERLAKL <sup>370</sup>       | AGG ↓ VAV ↓ IKAG <sup>380</sup> | AATEVELKER <sup>390</sup>       | KHRIEDAVRN <sup>400</sup> ↓     | AKAAVEEGIV <sup>410</sup>    | AGGGVTL ↓ LQA <sup>420</sup>    |
| APTLDELKLE <sup>430</sup>      | GDEATGANIV <sup>440</sup>       | KVALEAP ↓ LK ↓ Q <sup>450</sup> | IAFNNGLEPG <sup>460</sup>       | VVAEK ↓ VRN ↓ LP <sup>470</sup> | AGH ↓ GLNAQTG <sup>480</sup> | VYED ↓ LLAAG ↓ V <sup>490</sup> |
| ADPVKTRSA <sup>500</sup>       | LQNAASIAG ↓ L <sup>510</sup> ↓  | F ↓ LTTEAVVAD <sup>520</sup>    | KPEKEKASVP <sup>530</sup>       | GGGDMGG ↓ MDF <sup>540</sup>    |                              |                                 |

| Peptide sequences |                                                                                                                                                                           | Molecular mass, Da |          |
|-------------------|---------------------------------------------------------------------------------------------------------------------------------------------------------------------------|--------------------|----------|
|                   |                                                                                                                                                                           | Calculated         | Measured |
| 1                 | <sup>191</sup> MRFDKGYISGYFVTDPERQEAVLEDPYILLVSSKVSTVKDLLP LLEKVI GAGKPLLI IAEDVEGEALSTLVVNKIRGTFKSVAVKAPGF<br>GDRRKAMLQDMA ILTGGQVI SEEVGLTLENADLSLLGKARK <sup>320</sup> | 14067              | 14053    |
| 2                 | <sup>260</sup> LVVNKIRGTFKSVAVKAPGFGDRRKAMLQDMA ILTGGQVI SEEVGLTLENADLSLLGKARKVVVTKDETTIVEGAGDTDAIAGRVAQIR<br>QEIENSDDYDREKLQERLAKLAGG <sup>373</sup>                     | 12219              | 12229    |
| 3                 | <sup>154</sup> QSIGDLIAEAMDKVNEGVIITVEESNTFGLQLELTEGMRFKGYISGYFVTDPERQEAVLEDPYILLVSSKVSTVKDLLP LLEKVI GAG<br>KPLLI IAEDVEGEALSTLVVNK <sup>264</sup>                       | 12018              | 12017    |
| 4                 | <sup>377</sup> IKAGAATEVELKERKHRIEDAVRNAKAAVEEGIVAGGGVTL LQAAPTLDELKLEGDEATGANIVKVALEAPLKQIAFNNGLEPGVVAEK<br>VRNLPAGH <sup>473</sup>                                      | 10038              | 10040    |
| 5                 | <sup>448</sup> LKQIAFNNGLEPGVVAEKVRNLPAGHGLNAQTGVYEDLLAAGVADPVKTRRSALQNAASIAGLFLTTEAVVADKPEKEKASVPGGGDMG<br>GMD <sup>540</sup>                                            | 9442               | 9440     |
| 6                 | <sup>96</sup> ATVLAQALVREGLRNVAAGANPLGLKRGIEKAVEKVTETLLKGAKEVETKEQIAATAAISAGDQSIGDLIAEAMDKVNEGVIITVEESNT<br>FGLQ <sup>184</sup>                                           | 9228               | 9231     |
| 7                 | <sup>28</sup> VTLGPKGRNVVLEKKWGAPTITNDGVSIAKEIELEDPYEKI GAELVKEVAKKTDDVAGDGTTTATVLAQALVREGLRNVAAGANPLG <sup>114</sup>                                                     | 9035               | 9028     |
| 8                 | <sup>321</sup> VVVTKDETTIVEGAGDTDAIAGRVAQIRQEIENSDDYDREKLQERLAKLAGGVAVIKAGAATEVELKERKHRIEDAVRN <sup>400</sup>                                                             | 8713               | 8720     |
| 9                 | <sup>163</sup> AMDKVNEGVIITVEESNTFGLQLELTEGMRFKGYISGYFVTDPERQEAVLEDPYILLVSSKVSTVKDLLP <sup>233</sup>                                                                      | 7878               | 7880     |
| 10                | <sup>73</sup> VKEVAKKTDDVAGDGTTTATVLAQALVREGLRNVAAGANPLGLKRGIEKAVEKVTETLLKGAKEVETKEQIAATAA <sup>148</sup>                                                                 | 7810               | 7810     |
| 11                | <sup>220</sup> LVSSKVSTVKDLLP LLEKVI GAGKPLLI IAEDVEGEALSTLVVNKIRGTFKSVAVKAPGFGDRRKAMLQD <sup>289</sup>                                                                   |                    |          |
| 12                | <sup>28</sup> VTLGPKGRNVVLEKKWGAPTITNDGVSIAKEIELEDPYEKI GAELVKEVAKKTDDVAGDGTTTATVLAQA <sup>97</sup>                                                                       | 7427               | 7427     |
| 13                | <sup>401</sup> AKAAVEEGIVAGGGVTL LQAAPTLDELKLEGDEATGANIVKVALEAPLKQIAFNNGLEPGVVAEKVRN <sup>468</sup>                                                                       | 7347               | 7341     |
| 14                | <sup>448</sup> LKQIAFNNGLEPGVVAEKVRNLPAGHGLNAQTGVYEDLLAAGVADPVKTRRSALQNAASIAGL <sup>510</sup>                                                                             | 6848               | 6843     |
| 15                | <sup>252</sup> VEGEALSTLVVNKIRGTFKSVAVKAPGFGDRRKAMLQDMA ILTGGQVI SEEVGLTLENAD <sup>311</sup>                                                                              | 6378               | 6378     |
| 16                | <sup>202</sup> FVTDPERQEAVLEDPYILLVSSKVSTVKDLLP LLEKVI GAGKPLLI IAEDVEGEALST <sup>259</sup>                                                                               | 6328               | 6327     |
| 17                | <sup>126</sup> VTETLLKGAKEVETKEQIAATAAISAGDQSIGDLIAEAMDKVNEGVIITVEESNTFGLQ <sup>184</sup>                                                                                 | 6259               | 6250     |
| 18                | <sup>450</sup> QIAFNNGLEPGVVAEKVRNLPAGHGLNAQTGVYEDLLAAGVADPVKTRRSALQNAASIAG <sup>509</sup>                                                                                | 6089               | 6093     |
| 19                | <sup>109</sup> GANPLGLKRGIEKAVEKVTETLLKGAKEVETKEQIAATAAISAGDQSIGDLIAEA <sup>163</sup>                                                                                     | 6024               | 6030     |
| 20                | <sup>485</sup> LLAAGVADPVKTRRSALQNAASIAGLFLTTEAVVADKPEKEKASVPGGGDMGGMD <sup>540</sup>                                                                                     | 5602               | 5598     |

|    |                                                                                      |      |      |
|----|--------------------------------------------------------------------------------------|------|------|
| 21 | <sup>290</sup> MAILTGGQVISEEVGLTLENADLSLLGKARKVVVTKDETTIVEGAGDTDAIAGR <sup>343</sup> | 5570 | 5579 |
| 22 | <sup>486</sup> LAAGVADPVKVTRSALQNAASIAGLFLTTEAVVADKPEKEKASVPGGGDMGGMF <sup>540</sup> | 5524 | 5525 |
| 23 | <sup>106</sup> VAAGANPLGLKRGIEKAVEKVTETLLKGAKEVETKEQIAATAAISAGDQSIGD <sup>158</sup>  | 5457 | 5459 |
| 24 | <sup>164</sup> MDKVGNEGVIITVEESNTFGLQLELTEGMRFDKGYISGYFVTDPER <sup>208</sup>         | 5346 | 5347 |
| 25 | <sup>26</sup> VKVTLGPKGRNVVLEKKWGAPTITNDGVSIAKEIELEDPYEKIGAE <sup>71</sup>           | 5070 | 5080 |
| 26 | <sup>418</sup> LQAAPTLDLDELKLEGDEATGANIVKVALEAPLKQIAFNNGLEPGVVAEK <sup>465</sup>     | 4991 | 4988 |
| 27 | <sup>245</sup> LLIIAEDVEGEALSTLVVNKIRGTFKSVAVKAPGFGDRRKAMLQD <sup>289</sup>          | 4957 | 4947 |
| 28 | <sup>490</sup> VADPVKVTRSALQNAASIAGLFLTTEAVVADKPEKEKASVPGGGDMGG <sup>537</sup>       | 4855 | 4857 |
| 29 | <sup>202</sup> FVTDPERQEAVLEDPYILLVSSKVSTVKDLLPILLEKVIAGGK <sup>244</sup>            | 4751 | 4746 |
| 30 | <sup>466</sup> VRNLPAGHGLNAQTGVYEDLLAAGVADPVKVTRSALQNAASIAGLF <sup>511</sup>         | 4706 | 4710 |
| 31 | <sup>221</sup> VSSKVSTVKDLLPILLEKVIAGGKPLIIAEDVEGEALSTLVVNK <sup>264</sup>           | 4644 | 4642 |
| 32 | <sup>374</sup> VAVIKAGAATEVELKERKHRIEDAVRNAKAAVEEGIVAGGGVTL <sup>417</sup>           | 4585 | 4575 |
| 33 | <sup>466</sup> VRNLPAGHGLNAQTGVYEDLLAAGVADPVKVTRSALQNAASIAGL <sup>510</sup>          | 4524 | 4528 |
| 34 | <sup>466</sup> VRNLPAGHGLNAQTGVYEDLLAAGVADPVKVTRSALQNAASIAG <sup>509</sup>           | 4497 | 4491 |
| 35 | <sup>448</sup> LKQIAFNNGLEPGVVAEKVRNLPAGHGLNAQTGVYEDLLAAG <sup>489</sup>             | 4384 | 4395 |
| 36 | <sup>185</sup> LELTEGMRFDKGYISGYFVTDPERQEAVLEDPYILL <sup>220</sup>                   | 4316 | 4310 |
| 37 | <sup>252</sup> VEGEALSTLVVNKIRGTFKSVAVKAPGFGDRRKAMLQD <sup>289</sup>                 | 4206 | 4200 |

MMP-9 fragments

|                                 |                                |                                 |                                 |                                |                              |                                 |
|---------------------------------|--------------------------------|---------------------------------|---------------------------------|--------------------------------|------------------------------|---------------------------------|
| MAKTIAYDEE <sup>10</sup>        | ARRGLERGLN <sup>20</sup>       | ALADAVK ↓ VTL <sup>30</sup>     | GPKGRNVVLE <sup>40</sup>        | KKWGAPTITN <sup>50</sup>       | DGVSIACEIE <sup>60</sup>     | LEDPYEKIGA <sup>70</sup>        |
| EL ↓ VKEVAKKT <sup>80</sup>     | DDVAGDGTTT <sup>90</sup>       | ATVLA ↓ QALVR <sup>100</sup>    | EGLRN ↓ VAA ↓ GA <sup>110</sup> | NPLG ↓ LKRGIE <sup>120</sup>   | KAVEKVTETL <sup>130</sup>    | LKGAKEVETK <sup>140</sup>       |
| EQIAATAAIS <sup>150</sup>       | AGDQSIGD ↓ LI <sup>160</sup>   | AEA ↓ MDKVGNE <sup>170</sup>    | GVITVEESNT <sup>180</sup>       | FGLQ ↓ LELTEG <sup>190</sup> ↓ | MRFDKGYISG <sup>200</sup>    | Y ↓ FVTDPER ↓ QE <sup>210</sup> |
| AVLEDPYILL <sup>220</sup> ↓     | VSSKSVTVKD <sup>230</sup>      | LLPILLEKVI <sup>240</sup>       | AGKPLLI IAE <sup>250</sup>      | DVEGEALST ↓ L <sup>260</sup>   | VVNKIRGTFK <sup>270</sup>    | SVAVKAPGFG <sup>280</sup>       |
| DRRKAMLQD ↓ M <sup>290</sup>    | AILTGGQVIS <sup>300</sup>      | EEVGLTLENA <sup>310</sup>       | D ↓ LSLLGKARK <sup>320</sup> ↓  | VVVTKDETTI <sup>330</sup>      | VEGAGD TDAI <sup>340</sup>   | AGR ↓ VAQIRQE <sup>350</sup>    |
| IENSDSDYDR <sup>360</sup>       | EKLQERLAK ↓ L <sup>370</sup>   | AGG ↓ VAVIKAG <sup>380</sup>    | A ↓ ATEVELKER <sup>390</sup>    | KHRIEDAVRN <sup>400</sup>      | AKAAVEEGIV <sup>410</sup>    | AGGGVTL ↓ LQA <sup>420</sup>    |
| APTLDE ↓ LK ↓ LE <sup>430</sup> | GDEATGANIV <sup>440</sup>      | KVALEAP ↓ LK ↓ Q <sup>450</sup> | IAFNGLPEP <sup>460</sup>        | VVAEK ↓ VRNLP <sup>470</sup>   | AGH ↓ GLNAQTG <sup>480</sup> | VYEDLLAAG ↓ V <sup>490</sup>    |
| ADP ↓ VK ↓ VTRSA <sup>500</sup> | LQNAASIAG ↓ L <sup>510</sup> ↓ | F ↓ LTTEAVVAD <sup>520</sup>    | KPEKEKASV <sup>530</sup>        | GGGDMGG ↓ MDF <sup>540</sup>   |                              |                                 |

| Peptide sequences |                                                                                                                                                                                                                            | Molecular mass, Da |          |
|-------------------|----------------------------------------------------------------------------------------------------------------------------------------------------------------------------------------------------------------------------|--------------------|----------|
|                   |                                                                                                                                                                                                                            | Calculated         | Measured |
| 1                 | <sup>202</sup> FVTDPERQEAVLEDPYILLVSSKSVTVKD LLPILLEKVI GAGKPLLI I AEDVEGEALSTLVVNKIRGTFKSVAVKAPGFGDRRKAMLQDMA I LTGGQVISEEVGLTLENADLSLLGKARKVVVTKDETTIVEGAGD TDAIAGRVAQIRQEIENSDSDYDREKLQERLAK <sup>369</sup>             | 18162              | 18157    |
| 2                 | <sup>191</sup> MRFDKGYISGYFVTDPERQEAVLEDPYILLVSSKSVTVKD LLPILLEKVI GAGKPLLI I AEDVEGEALSTLVVNKIRGTFKSVAVKAPGFG DRRKAMLQDMA I LTGGQVISEEVGLTLENADLSLLGKARK <sup>320</sup>                                                   | 14067              | 14056    |
| 3                 | <sup>370</sup> LAGGVAVIKAGAAATEVELKERKHRIEDAVRNAKAAVEEGIVAGGGVTL LQAAPTLDELKLEGDEATGANIVKVALEAPLKQIAFNGLPEP GVVAEK <sup>465</sup>                                                                                          | 9761               | 9759     |
| 4                 | <sup>221</sup> VSSKSVTVKD LLPILLEKVI GAGKPLLI I AEDVEGEALSTLVVNKIRGTFKSVAVKAPGFGDRRKAMLQDMA I LTGGQVISEEVGLTLEN AD <sup>311</sup>                                                                                          | 9555               | 9562     |
| 5                 | <sup>418</sup> LQAAPTLDELKLEGDEATGANIVKVALEAPLKQIAFNGLPEPGVVAEKVRNLPAGHGLNAQTGVYEDLLAAGVADPVK VTRSA LQNAASI AGL <sup>510</sup>                                                                                             | 9436               | 9435     |
| 6                 | <sup>96</sup> ATVLAQALVREGLRNVAAGANPLGLKRGIEKAVEKVTETLLKGAKEVETKEQIAATAAISAGDQSIGDLIAEAMDKVGNEGVITVEESNTF GLQ <sup>184</sup>                                                                                               | 9228               | 9231     |
| 7                 | <sup>28</sup> VTLGPKGRNVVLEKKWGAPTITNDGVSIACEIELEDPYEKIGAE L VKEVAKKTDDVAGDGTTTATVLAQALVREGLRNVAAGANPLG <sup>114</sup>                                                                                                     | 9035               | 9028     |
| 8                 | <sup>106</sup> VAAGANPLGLKRGIEKAVEKVTETLLKGAKEVETKEQIAATAAISAGDQSIGDLIAEAMDKVGNEGVITVEESNTFGLQLELTEG <sup>190</sup>                                                                                                        | 8733               | 8723     |
| 9                 | <sup>418</sup> LQAAPTLDELKLEGDEATGANIVKVALEAPLKQIAFNGLPEPGVVAEKVRNLPAGHGLNAQTGVYEDLLAAGVADPVK <sup>495</sup><br><sup>115</sup> LKRGIEKAVEKVTETLLKGAKEVETKEQIAATAAISAGDQSIGDLIAEAMDKVGNEGVITVEESNTFGLQLELTEG <sup>190</sup> | 7983               | 7976     |
| 10                | <sup>312</sup> LSLLGKARKVVVTKDETTIVEGAGD TDAIAGRVAQIRQEIENSDSDYDREKLQERLAKLAGGVAVIKAGA <sup>381</sup>                                                                                                                      | 7405               | 7406     |
| 11                | <sup>429</sup> LEGDEATGANIVKVALEAPLKQIAFNGLPEPGVVAEKVRNLPAGHGLNAQTGVYEDLLAAGVADP <sup>493</sup>                                                                                                                            | 6576               | 6582     |
| 12                | <sup>474</sup> GLNAQTGVYEDLLAAGVADPVK VTRSA LQNAASIAGLFLTTEAVVADKPEKEKASVPGGGDMGG <sup>537</sup>                                                                                                                           | 6324               | 6320     |
| 13                | <sup>202</sup> FVTDPERQEAVLEDPYILLVSSKSVTVKD LLPILLEKVI GAGKPLLI I AEDVEGEALST <sup>259</sup>                                                                                                                              | 6259               | 6249     |
| 14                | <sup>450</sup> QIAFNGLPEPGVVAEKVRNLPAGHGLNAQTGVYEDLLAAGVADPVK VTRSA LQNAASIAG <sup>509</sup>                                                                                                                               | 6024               | 6030     |
| 15                | <sup>109</sup> GANPLGLKRGIEKAVEKVTETLLKGAKEVETKEQIAATAAISAGDQSIGDLIAEA <sup>163</sup>                                                                                                                                      | 5602               | 5595     |
| 16                | <sup>290</sup> MAILTGGQVISEEVGLTLENADLSLLGKARKVVVTKDETTIVEGAGD TDAIAGR <sup>343</sup>                                                                                                                                      | 5524               | 5530     |
| 17                | <sup>374</sup> VAVIKAGAAATEVELKERKHRIEDAVRNAKAAVEEGIVAGGGVTL LQAAPTLDE <sup>426</sup>                                                                                                                                      | 5462               | 5462     |
| 18                | <sup>106</sup> VAAGANPLGLKRGIEKAVEKVTETLLKGAKEVETKEQIAATAAISAGDQSIGD <sup>158</sup>                                                                                                                                        | 5346               | 5350     |

|    |                                                                                  |      |      |
|----|----------------------------------------------------------------------------------|------|------|
| 19 | <sup>164</sup> MDKVGNEGVI <sup>208</sup> TVEESNTFGLQLELTEGMREFDKGYISGYFVTDPER    | 5070 | 5077 |
| 20 | <sup>418</sup> LQAAPTLDLKLKLEGDEATGANIVKVALEAPLKQIAFN <sup>465</sup> SGLEPGVVAEK | 4957 | 4965 |
| 21 | <sup>494</sup> VKVTR <sup>540</sup> SALQNAAS IAGLFLTTEAVVADKPEKEKASVPGGGDMGGMDF  | 4762 | 4763 |
| 22 | <sup>159</sup> LIAEAMDKVGNEGVI <sup>201</sup> TVEESNTFGLQLELTEGMREFDKGYISGY      | 4723 | 4726 |
| 23 | <sup>466</sup> VRNLPAGHGLNAQTGVYEDLLAAGVADPVKVTR <sup>511</sup> SALQNAAS IAGLF   | 4644 | 4638 |
| 24 | <sup>374</sup> VAVIKAGAATEVELKERKHRIEDAVRNAKAAVEEGIVAGGGVTL <sup>417</sup>       | 4524 | 4528 |
| 25 | <sup>466</sup> VRNLPAGHGLNAQTGVYEDLLAAGVADPVKVTR <sup>510</sup> SALQNAAS IAGL    | 4497 | 4500 |
| 26 | <sup>466</sup> VRNLPAGHGLNAQTGVYEDLLAAGVADPVKVTR <sup>509</sup> SALQNAAS IAG     | 4384 | 4396 |
| 27 | <sup>448</sup> LKQIAFN <sup>489</sup> SGLEPGVVAEKVRNLPAGHGLNAQTGVYEDLLAAG        | 4316 | 4321 |
| 28 | <sup>73</sup> VKEVAKKTDDVAGDGT <sup>114</sup> TTATVLAQALVREGLRNVAAGANPLG         | 4176 | 4184 |
| 29 | <sup>450</sup> QIAFN <sup>489</sup> SGLEPGVVAEKVRNLPAGHGLNAQTGVYEDLLAAG          | 4075 | 4070 |

MMP-14 fragments

|                                   |                                |                              |                              |                              |                                 |                                    |
|-----------------------------------|--------------------------------|------------------------------|------------------------------|------------------------------|---------------------------------|------------------------------------|
| MAKTIAYDEE <sup>10</sup>          | ARRGLERGLN <sup>20</sup>       | A ↓ LADAVKVTL <sup>30</sup>  | GPKGRNVVLE <sup>40</sup>     | KKWGAPTITN <sup>50</sup>     | DGVSIAKEIE <sup>60</sup>        | LEDPYE ↓ KIGA <sup>70</sup>        |
| EL ↓ VKEVAKKT <sup>80</sup>       | DDVAGDGT <sup>90</sup>         | ATVLAQALVR <sup>100</sup>    | EGLRN ↓ VAAGA <sup>110</sup> | NPLG ↓ LKRGIE <sup>120</sup> | KAVEK ↓ VTETL <sup>130</sup>    | LKGAKEVETK <sup>140</sup>          |
| EQIAATAA ↓ IS <sup>150</sup>      | AGDQSIGD ↓ LI <sup>160</sup>   | AE ↓ AMDKVGNE <sup>170</sup> | GVITVEESNT <sup>180</sup>    | FGLQLELTEG <sup>190</sup> ↓  | MRFDKGYISG <sup>200</sup>       | Y ↓ FVTDPERQE <sup>210</sup>       |
| AVLEDPYILL <sup>220</sup>         | VSSKVST ↓ VKD <sup>230</sup> ↓ | LLPLLEKVVIG <sup>240</sup>   | AGKPLLIIE <sup>250</sup>     | DVEGEALSTL <sup>260</sup>    | VVNKIRGTFK <sup>270</sup>       | SVAVKAPGFG <sup>280</sup>          |
| DRRKAM ↓ LQD ↓ M <sup>290</sup>   | AILTGGQVIS <sup>300</sup>      | EEVGLTLENA <sup>310</sup>    | DLSELLGKARK <sup>320</sup>   | VVVTKDETTI <sup>330</sup>    | VEGAGDTDAI <sup>340</sup>       | AGRVAQIRQE <sup>350</sup>          |
| IENSDDYDR <sup>360</sup>          | EKLQERLAKL <sup>370</sup>      | AGGVAVIKAG <sup>380</sup>    | AATEVELKER <sup>390</sup>    | KHRIEDAVRN <sup>400</sup> ↓  | AKA ↓ AVEEGIV <sup>410</sup>    | AGGGVTL ↓ LQA <sup>420</sup>       |
| APTLDELKLE <sup>430</sup>         | GDEATGANIV <sup>440</sup>      | KVALEAP ↓ LKQ <sup>450</sup> | IAFNNGLEPG <sup>460</sup>    | VVAEK ↓ VRNLP <sup>470</sup> | AG ↓ HG ↓ LNAQTG <sup>480</sup> | VYED ↓ L ↓ LAAG ↓ V <sup>490</sup> |
| ADPVK ↓ VTRS ↓ A <sup>500</sup> ↓ | LQNAASIALG <sup>510</sup>      | FLTTEAVVAD <sup>520</sup>    | KPEKEKASVP <sup>530</sup>    | GGGDMGGMDF <sup>540</sup>    |                                 |                                    |

| Peptide sequences |                                                                                                                                                                                                                            | Molecular mass, Da |          |
|-------------------|----------------------------------------------------------------------------------------------------------------------------------------------------------------------------------------------------------------------------|--------------------|----------|
|                   |                                                                                                                                                                                                                            | Calculated         | Measured |
| 1                 | <sup>287</sup> LQDMAILTGGQVISEEVGLTLENADLSLLGKARKVVVTKDETTIVEGAGDTDAIAGRVAQIRQEIENSDDYDREKLQERLAKLAGGVAVIKAGAATEVELKERKHRIEDAVRN <sup>400</sup>                                                                            | 12276              | 12283    |
| 2                 | <sup>22</sup> LADAVKVTLGPKGRNVVLEKKWGAPTTITNDGVSIAKEIELEDPYEKIGAEKVKEVAKKTDDVAGDGT <sup>125</sup> TATVLAQALVREGLRNVAAGANPLGLKRGIEKAVEK                                                                                     | 10884              | 10877    |
| 3                 | <sup>67</sup> KIGELVKEVAKKTDDVAGDGT <sup>162</sup> TATVLAQALVREGLRNVAAGANPLGLKRGIEKAVEKVTETLLKGAKEVETKEQIAATAAISAGDQSIGD                                                                                                   | 9791               | 9791     |
| 4                 | <sup>106</sup> VAAGANPLGLKRGIEKAVEKVTETLLKGAKEVETKEQIAATAAISAGDQSIGDLIAEAMDKVNEGVIITVEESNTFGLQLELTEG <sup>190</sup>                                                                                                        | 8733               | 8731     |
| 5                 | <sup>149</sup> ISAGDQSIGDLIAEAMDKVNEGVIITVEESNTFGLQLELTEGMRFKGYISGYFVTDPERQEAVLEDPYILLVSSKVST <sup>227</sup>                                                                                                               | 8583               | 8590     |
| 6                 | <sup>418</sup> LQAAPTLDELKLEGDEATGANIVKVALEAPLKQIAFNNGLEPGVVAEKVRNLPAGHGLNAQTGVYEDLLAAGVADPVK <sup>495</sup><br><sup>115</sup> LKRGIEKAVEKVTETLLKGAKEVETKEQIAATAAISAGDQSIGDLIAEAMDKVNEGVIITVEESNTFGLQLELTEG <sup>190</sup> | 7983               | 7978     |
| 7                 | <sup>418</sup> LQAAPTLDELKLEGDEATGANIVKVALEAPLKQIAFNNGLEPGVVAEKVRNLPAGHGLNAQTGVYEDLLAAG <sup>489</sup>                                                                                                                     | 7374               | 7375     |
| 8                 | <sup>404</sup> AVEEGIVAGGGVTLQAAPTLDELKLEGDEATGANIVKVALEAPLKQIAFNNGLEPGVVAEKVRNLPAGHG <sup>474</sup>                                                                                                                       | 7111               | 7104     |
| 9                 | <sup>448</sup> LKQIAFNNGLEPGVVAEKVRNLPAGHGLNAQTGVYEDLLAAGVADPVKVTRSALQNAASIALG <sup>510</sup>                                                                                                                              | 6378               | 6373     |
| 10                | <sup>231</sup> LLPLLEKVVIGAGKPLLIIEAEDVEGEALSTLVVNKIRGTFKSVAVKAPGFGDRRKAMLQD <sup>289</sup>                                                                                                                                | 6284               | 6279     |
| 11                | <sup>418</sup> LQAAPTLDELKLEGDEATGANIVKVALEAPLKQIAFNNGLEPGVVAEKVRNLPAG <sup>472</sup>                                                                                                                                      | 5664               | 5659     |
| 12                | <sup>485</sup> LLAAGVADPVKVTRSALQNAASIALGFLTTEAVVADKPEKEKASVPGGGDMGGMDF <sup>540</sup>                                                                                                                                     | 5570               | 5579     |
| 13                | <sup>486</sup> LAAGVADPVKVTRSALQNAASIALGFLTTEAVVADKPEKEKASVPGGGDMGGMDF <sup>540</sup>                                                                                                                                      | 5457               | 5450     |
| 14                | <sup>159</sup> LIAEAMDKVNEGVIITVEESNTFGLQLELTEGMRFKGYISGY <sup>201</sup>                                                                                                                                                   | 4723               | 4731     |
| 15                | <sup>496</sup> VTRSALQNAASIALGFLTTEAVVADKPEKEKASVPGGGDMGGMDF <sup>540</sup>                                                                                                                                                | 4535               | 4531     |
| 16                | <sup>466</sup> VRNLPAGHGLNAQTGVYEDLLAAGVADPVKVTRSALQNAASIALG <sup>509</sup>                                                                                                                                                | 4384               | 4390     |
| 17                | <sup>448</sup> LKQIAFNNGLEPGVVAEKVRNLPAGHGLNAQTGVYEDLLAAG <sup>489</sup>                                                                                                                                                   | 4316               | 4321     |
| 18                | <sup>73</sup> VKEVAKKTDDVAGDGT <sup>114</sup> TATVLAQALVREGLRNVAAGANPLG                                                                                                                                                    | 4176               | 4177     |
| 19                | <sup>501</sup> LQNAASIALGFLTTEAVVADKPEKEKASVPGGGDMGGMDF <sup>540</sup>                                                                                                                                                     | 4021               | 4020     |
| 20                | <sup>510</sup> FLTTEAVVADKPEKEKASVPGGGDMGGMDF <sup>540</sup>                                                                                                                                                               | 3196               | 3192     |



MMP-15 fragments

|                                              |                              |                                                           |                                                                           |                                                                 |                                                           |                                           |
|----------------------------------------------|------------------------------|-----------------------------------------------------------|---------------------------------------------------------------------------|-----------------------------------------------------------------|-----------------------------------------------------------|-------------------------------------------|
| MAKTIAYDEE <sup>10</sup>                     | ARRGLERGLN <sup>20</sup>     | ALADA ↓ VK ↓ VTL <sup>30</sup>                            | GPKGRNVVLE <sup>40</sup>                                                  | KWGAPTITN <sup>50</sup>                                         | DGVSIAKEIE <sup>60</sup>                                  | LEDPYEKIGA <sup>70</sup>                  |
| ELVKEVAKKT <sup>80</sup>                     | DDVAGDGT <sup>90</sup>       | ATVLA ↓ QA ↓ LVR <sup>100</sup>                           | EGLRNVAAGA <sup>110</sup>                                                 | NPLG ↓ LKRGIE <sup>120</sup>                                    | KAVEKVTETL <sup>130</sup>                                 | LKGAKEVETK <sup>140</sup>                 |
| EQIAATAA ↓ IS <sup>150</sup>                 | AGD ↓ QSIGDLI <sup>160</sup> | AEAMDKVGNE <sup>170</sup>                                 | GVITVEESNT <sup>180</sup>                                                 | FG ↓ LQLELTEG <sup>190</sup>                                    | MRFDKGYISG <sup>200</sup>                                 | YFVTDPER ↓ QE <sup>210</sup>              |
| AVLEDPYIL ↓ L <sup>220</sup>                 | VSSKVSTVKD <sup>230</sup>    | LLP <sup>240</sup> LLEK <sup>240</sup> VIG <sup>240</sup> | AGKP ↓ LLI <sup>250</sup> IAE <sup>250</sup>                              | D ↓ VE <sup>260</sup> GEAL <sup>260</sup> ST ↓ L <sup>260</sup> | VVN <sup>270</sup> KIR <sup>270</sup> GTFK <sup>270</sup> | SVAVKAPGFG <sup>280</sup>                 |
| DRRKAMLQD ↓ M <sup>290</sup>                 | AILTGGQVIS <sup>300</sup>    | EEVGLTLENA <sup>310</sup>                                 | DLSLLGKARK <sup>320</sup>                                                 | VVVT <sup>330</sup> KDE <sup>330</sup> TTI <sup>330</sup>       | VEGAGD <sup>340</sup> TDAI <sup>340</sup>                 | AGRVAQIRQE <sup>350</sup>                 |
| IENS <sup>360</sup> SDSYDR <sup>360</sup>    | EKLQERLAK ↓ L <sup>370</sup> | AGGVAV ↓ IKAG <sup>380</sup>                              | AATEVELKER <sup>390</sup>                                                 | KHRIE <sup>400</sup> DAVRN <sup>400</sup> ↓                     | AKA ↓ AVEEGIV <sup>410</sup>                              | AGGGV <sup>420</sup> TLLQA <sup>420</sup> |
| AP <sup>430</sup> TLDE ↓ LKLE <sup>430</sup> | GDEATGAN ↓ IV <sup>440</sup> | KVALEAPLKQ <sup>450</sup>                                 | IAFN <sup>460</sup> SGL <sup>460</sup> EP <sup>460</sup> G <sup>460</sup> | VVAEK ↓ VRNLP <sup>470</sup>                                    | AGH ↓ GLNA ↓ QTG <sup>480</sup>                           | VYEDLLAAGV <sup>490</sup>                 |
| ADP ↓ VKVTRSA <sup>500</sup>                 | LQNAAS ↓ IAGL <sup>510</sup> | F ↓ LTTEAVVAD <sup>520</sup>                              | KPEKEKASVP <sup>530</sup>                                                 | GGGDMGGMDF <sup>540</sup>                                       |                                                           |                                           |

| Peptide sequences |                                                                                                                                                                                                                                                              | Molecular mass, Da |          |
|-------------------|--------------------------------------------------------------------------------------------------------------------------------------------------------------------------------------------------------------------------------------------------------------|--------------------|----------|
|                   |                                                                                                                                                                                                                                                              | Calculated         | Measured |
| 1                 | <sup>26</sup> VKVTILGPKGRNVVLEKKWGAPTITNDGVSIAKEIELEDPYEKIGAEELVKEVAKKTDDVAGDGT <sup>148</sup> TTATVLAQALVREGLRNVAAGANPLGLKRGIEKAVEKVTETLLKGAKEVETKEQIAATAA <sup>148</sup>                                                                                   | 12896              | 12889    |
| 2                 | <sup>401</sup> AKAAVEEGIVAGGGV <sup>511</sup> TLLQAAPTLD <sup>511</sup> ELKLEGDEATGANIVKVALEAPLKQIAFN <sup>511</sup> SGL <sup>511</sup> EPGVVAEKVRNLPAGHGLNAQTGVYEDLLAAGVADPVK <sup>511</sup> VTR <sup>511</sup> SALQNAAS <sup>511</sup> IAGL <sup>511</sup> | 11106              | 11107    |
| 3                 | <sup>370</sup> L <sup>477</sup> AGGVAVIKAGAATEVELKERKHRIE <sup>477</sup> DAVRN <sup>477</sup> AKAAVEEGIVAGGGV <sup>477</sup> TLLQAAPTLD <sup>477</sup> ELKLEGDEATGANIVKVALEAPLKQIAFN <sup>477</sup> SGL <sup>477</sup> EPGVVAEKVRNLPAGHGLNA <sup>477</sup>   | 10961              | 10970    |
| 4                 | <sup>154</sup> QSIGDLIAEAMDKVNEGVI <sup>251</sup> TVEESNTFGLQLELTEGMRF <sup>251</sup> DKGYISGYFVTDPERQEAVLEDPYILLVSSKVSTVKDLLP <sup>251</sup> LLEK <sup>251</sup> VIGAGKP                                                                                    | 10678              | 10680    |
| 5                 | <sup>401</sup> AKAAVEEGIVAGGGV <sup>506</sup> TLLQAAPTLD <sup>506</sup> ELKLEGDEATGANIVKVALEAPLKQIAFN <sup>506</sup> SGL <sup>506</sup> EPGVVAEKVRNLPAGHGLNAQTGVYEDLLAAGVADPVK <sup>506</sup> VTR <sup>506</sup> SALQNAAS <sup>506</sup>                     | 10605              | 10604    |
| 6                 | <sup>377</sup> IKAGAATEVELKERKHRIE <sup>473</sup> DAVRN <sup>473</sup> AKAAVEEGIVAGGGV <sup>473</sup> TLLQAAPTLD <sup>473</sup> ELKLEGDEATGANIVKVALEAPLKQIAFN <sup>473</sup> SGL <sup>473</sup> EPGVVAEKVRNLPAGH <sup>473</sup>                              | 10038              | 10032    |
| 7                 | <sup>377</sup> IKAGAATEVELKERKHRIE <sup>465</sup> DAVRN <sup>465</sup> AKAAVEEGIVAGGGV <sup>465</sup> TLLQAAPTLD <sup>465</sup> ELKLEGDEATGANIVKVALEAPLKQIAFN <sup>465</sup> SGL <sup>465</sup> EPGVVAEK <sup>465</sup>                                      | 9194               | 9194     |
| 8                 | <sup>28</sup> VTLGPKGRNVVLEKKWGAPTITNDGVSIAKEIELEDPYEKIGAEELVKEVAKKTDDVAGDGT <sup>114</sup> TTATVLAQALVREGLRNVAAGANPLG <sup>114</sup>                                                                                                                        | 9035               | 9033     |
| 9                 | <sup>220</sup> LVSSKVSTVKDLLP <sup>289</sup> LLEK <sup>289</sup> VIGAGKPLLI <sup>289</sup> IAEDVEGEALSTLVVNKIRGTFKSVAVKAPGFGDRRKAMLQD <sup>289</sup>                                                                                                         | 7427               | 7422     |
| 10                | <sup>28</sup> VTLGPKGRNVVLEKKWGAPTITNDGVSIAKEIELEDPYEKIGAEELVKEVAKKTDDVAGDGT <sup>97</sup> TTATVLAQA <sup>97</sup>                                                                                                                                           | 7347               | 7338     |
| 11                | <sup>28</sup> VTLGPKGRNVVLEKKWGAPTITNDGVSIAKEIELEDPYEKIGAEELVKEVAKKTDDVAGDGT <sup>95</sup> TTATVLA <sup>95</sup>                                                                                                                                             | 7147               | 7142     |
| 12                | <sup>439</sup> IVKVALEAPLKQIAFN <sup>493</sup> SGL <sup>493</sup> EPGVVAEKVRNLPAGHGLNAQTGVYEDLLAAGVADP <sup>493</sup>                                                                                                                                        | 5619               | 5619     |
| 13                | <sup>209</sup> QEAVLEDPYILLVSSKVSTVKDLLP <sup>259</sup> LLEK <sup>259</sup> VIGAGKPLLI <sup>259</sup> IAEDVEGEALST <sup>259</sup>                                                                                                                            | 5415               | 5418     |
| 14                | <sup>427</sup> LKLEGDEATGANIVKVALEAPLKQIAFN <sup>477</sup> SGL <sup>477</sup> EPGVVAEKVRNLPAGHGLNA <sup>477</sup>                                                                                                                                            | 5218               | 5213     |
| 15                | <sup>245</sup> LLI <sup>289</sup> IAEDVEGEALSTLVVNKIRGTFKSVAVKAPGFGDRRKAMLQD <sup>289</sup>                                                                                                                                                                  | 4855               | 4850     |
| 16                | <sup>404</sup> AVEEGIVAGGGV <sup>450</sup> TLLQAAPTLD <sup>450</sup> ELKLEGDEATGANIVKVALEAPLKQ <sup>450</sup>                                                                                                                                                | 4697               | 4697     |
| 17                | <sup>183</sup> LQLELTEGMRF <sup>220</sup> DKGYISGYFVTDPERQEAVLEDPYILL <sup>220</sup>                                                                                                                                                                         | 4447               | 4453     |
| 18                | <sup>252</sup> VEGEALSTLVVNKIRGTFKSVAVKAPGFGDRRKAMLQD <sup>289</sup>                                                                                                                                                                                         | 4087               | 4083     |
| 19                | <sup>427</sup> LKLEGDEATGANIVKVALEAPLKQIAFN <sup>465</sup> SGL <sup>465</sup> EPGVVAEK <sup>465</sup>                                                                                                                                                        | 4018               | 4013     |

MMP-16 fragments

|                                 |                                   |                                |                              |                                 |                                 |                                 |
|---------------------------------|-----------------------------------|--------------------------------|------------------------------|---------------------------------|---------------------------------|---------------------------------|
| MAKTIAYDEE <sup>10</sup>        | ARRGLERGLN <sup>20</sup>          | A ↓ LADAVKVTL <sup>30</sup>    | GPKGRNVVLE <sup>40</sup>     | KKWGAPTITN <sup>50</sup>        | DGVSIAKEIE <sup>60</sup>        | LEDPYEKIGA <sup>70</sup>        |
| ELVKEVAKKT <sup>80</sup>        | DDVAGDGT <sup>90</sup>            | ATVLAQA ↓ LVR <sup>100</sup>   | EGLRNVAAGA <sup>110</sup>    | NPLGLKRGIE <sup>120</sup>       | KAVEK ↓ VTETL <sup>130</sup>    | LKGAKEVETK <sup>140</sup>       |
| EQIAATAAIS <sup>150</sup>       | AGD ↓ QSIGDLI <sup>160</sup>      | AEA ↓ MDKVGNE <sup>170</sup>   | GVITVEESNT <sup>180</sup>    | FGLQLELTEG <sup>190</sup>       | MRFDKGYISG <sup>200</sup>       | YFVTDPER ↓ QE <sup>210</sup>    |
| AVLEDPYILL <sup>220</sup>       | VSSKVST ↓ VKD <sup>230</sup> ↓    | LLP LLEKVI G <sup>240</sup>    | AGKP ↓ LLIIAE <sup>250</sup> | D ↓ VEGEALST ↓ L <sup>260</sup> | VVNKIRGTFK <sup>270</sup>       | SVAVKAPGFG <sup>280</sup>       |
| DRRKAMLQD ↓ M <sup>290</sup>    | AILTGGQVIS <sup>300</sup>         | EEVGLTLENA <sup>310</sup>      | DLS ↓ LLGKARK <sup>320</sup> | VVVTKDETTI <sup>330</sup>       | VEGAGDTDAI <sup>340</sup>       | AGRVAQIRQE <sup>350</sup>       |
| IENS DSDYDR <sup>360</sup>      | EKLQERLAKL <sup>370</sup>         | AGGVAV ↓ IKAG <sup>380</sup>   | A ↓ ATEVELKER <sup>390</sup> | KHRIEDAVRN <sup>400</sup> ↓     | AKA ↓ AVEEGIV <sup>410</sup>    | AGGGVTL LQA <sup>420</sup>      |
| APTLDE ↓ LK ↓ LE <sup>430</sup> | GDEATGAN ↓ IV <sup>440</sup>      | KVALEAPLK ↓ Q <sup>450</sup> ↓ | IAFN SGL EPG <sup>460</sup>  | VVAEK ↓ VRNLP <sup>470</sup>    | AGH ↓ GLNA ↓ QTG <sup>480</sup> | VYED ↓ LLAAG ↓ V <sup>490</sup> |
| ADP ↓ VKVTRSA <sup>500</sup>    | LQNAAS ↓ IAG ↓ L <sup>510</sup> ↓ | FLTTEAVVAD <sup>520</sup>      | KPEKEKASVP <sup>530</sup>    | GGGDMGG ↓ MDF <sup>540</sup>    |                                 |                                 |

| Peptide sequences |                                                                                                                                                                                | Molecular mass, Da |          |
|-------------------|--------------------------------------------------------------------------------------------------------------------------------------------------------------------------------|--------------------|----------|
|                   |                                                                                                                                                                                | Calculated         | Measured |
| 1                 | <sup>314</sup> LLGKARKVVVTKDETTIVEGAGDTDAIAGRVAQIRQEIENS DSDYDREKLQERLAKLAGGVAVIKAGAAATEVELKERKHRIEDAVRNAKA<br>AVEEGIVAGGGVTL LQAAPT LDELKLEGDEATGANIVKVALEAPLK <sup>449</sup> | 14301              | 14302    |
| 2                 | <sup>98</sup> LVREGLRNVAAGANPLGLKRGIEKAVEKVTETLLKGAKEVETKEQIAATAAISAGDQSIGDLIAEAMDKVGN EGVITVEESNTFGLQLELT<br>EGMRFDKGYISGYFVTDPERQEAVLEDPYILLVSSKVST <sup>227</sup>           | 13905              | 13912    |
| 3                 | <sup>22</sup> LADAVKVTLGPKGRNVVLEKKWGAPTITNDGVSIAKEIELEDPYEKIGAELVKEVAKKTDDVAGDGT TTTATVLAQALVREGLRNVAAGANP<br>LGLKRGIEKAVEK <sup>125</sup>                                    | 10884              | 10880    |
| 4                 | <sup>404</sup> AVEEGIVAGGGVTL LQAAPT LDELKLEGDEATGANIVKVALEAPLKQIAFN SGL EPGVVAEKVRNLPAGHGLNAQTGVYEDLLAAGVADPV<br>KVTR SALQNAAS IAGL <sup>510</sup>                            | 10689              | 10698    |
| 5                 | <sup>154</sup> QSIGDLIAEAMDKVGN EGVITVEESNTFGLQLELTEGMRFDKGYISGYFVTDPERQEAVLEDPYILLVSSKVSTVKDLLP LLEKVI GAGKP<br>LLIIAE <sup>251</sup>                                         | 10678              | 10674    |
| 6                 | <sup>401</sup> AKAAVEEGIVAGGGVTL LQAAPT LDELKLEGDEATGANIVKVALEAPLKQIAFN SGL EPGVVAEKVRNLPAGHGLNAQTGVYEDLLAAGVA<br>DPVKVTR SALQNAAS <sup>506</sup>                              | 10605              | 10596    |
| 7                 | <sup>404</sup> AVEEGIVAGGGVTL LQAAPT LDELKLEGDEATGANIVKVALEAPLKQIAFN SGL EPGVVAEKVRNLPAGHGLNAQTGVYEDLLAAGVADPV<br>KVTR SALQNAAS IAG <sup>509</sup>                             | 10576              | 10571    |
| 8                 | <sup>377</sup> IKAGAAATEVELKERKHRIEDAVRNAKAAVEEGIVAGGGVTL LQAAPT LDELKLEGDEATGANIVKVALEAPLKQIAFN SGL EPGVVAEKVR<br>NLPAGH <sup>473</sup>                                       | 10038              | 10031    |
| 9                 | <sup>377</sup> IKAGAAATEVELKERKHRIEDAVRNAKAAVEEGIVAGGGVTL LQAAPT LDELKLEGDEATGANIVKVALEAPLKQIAFN SGL EPGVVAEK <sup>465</sup>                                                   | 9194               | 9187     |
| 10                | <sup>164</sup> MDKVGNEGVITVEESNTFGLQLELTEGMRFDKGYISGYFVTDPERQEAVLEDPYILLVSSKVSTVKD <sup>230</sup>                                                                              | 7485               | 7477     |
| 11                | <sup>439</sup> IVKVALEAPLKQIAFN SGL EPGVVAEKVRNLPAGHGLNAQTGVYEDLLAAGVADP <sup>493</sup>                                                                                        | 5619               | 5617     |
| 12                | <sup>485</sup> LLAAGVADPVKVTR SALQNAAS IAGLFLTTEAVVADKPEKEKASVPGGDMGGMF <sup>540</sup>                                                                                         | 5570               | 5570     |
| 13                | <sup>209</sup> QEAVLEDPYILLVSSKVSTVKDLLP LLEKVI GAGKPLIIAE DVEGEALST <sup>259</sup>                                                                                            | 5415               | 5415     |
| 14                | <sup>427</sup> LKLEGDEATGANIVKVALEAPLKQIAFN SGL EPGVVAEKVRNLPAGHGLNA <sup>477</sup>                                                                                            | 5218               | 5213     |
| 15                | <sup>382</sup> ATEVELKERKHRIEDAVRNAKAAVEEGIVAGGGVTL LQAAPT LDELK <sup>428</sup>                                                                                                | 4995               | 4999     |
| 16                | <sup>245</sup> LLIIAE DVEGEALSTLVVNKIRGTFKSVAVKAPGFGDRRKAMLQD <sup>289</sup>                                                                                                   | 4855               | 4844     |
| 17                | <sup>490</sup> VADPVKVTR SALQNAAS IAGLFLTTEAVVADKPEKEKASVPGGDMGG <sup>537</sup>                                                                                                | 4751               | 4747     |
| 18                | <sup>404</sup> AVEEGIVAGGGVTL LQAAPT LDELKLEGDEATGANIVKVALEAPLKQ <sup>450</sup>                                                                                                | 4697               | 4693     |

|    |                                                                       |      |      |
|----|-----------------------------------------------------------------------|------|------|
| 19 | <sup>427</sup> LKLEGDEATGANIVKVALEAPLKQIAFNNGLEPGVVAEK <sup>465</sup> | 4018 | 4017 |
|----|-----------------------------------------------------------------------|------|------|

| MMP-17 fragments               |                                                                                                                                                                                                                                 |                                 |                              |                                |                              |                                 |          |       |
|--------------------------------|---------------------------------------------------------------------------------------------------------------------------------------------------------------------------------------------------------------------------------|---------------------------------|------------------------------|--------------------------------|------------------------------|---------------------------------|----------|-------|
| MAKTIAYDEE <sup>10</sup>       | ARRGLERGLN <sup>20</sup>                                                                                                                                                                                                        | ALADAVKVTL <sup>30</sup>        | GPKGRNVVLE <sup>40</sup>     | KKWGAPTITN <sup>50</sup>       | DGVSIAKEIE <sup>60</sup>     | LEDPYEKIGA <sup>70</sup>        |          |       |
| E ↓ LVKEVAKKT <sup>80</sup>    | DDVAGDGTTT <sup>90</sup>                                                                                                                                                                                                        | ATVLAQALVR <sup>100</sup>       | EGLRNVAAGA <sup>110</sup>    | NPLGLKRGIE <sup>120</sup>      | KAVEKVTETL <sup>130</sup>    | LKGAKEVETK <sup>140</sup>       |          |       |
| EQIAATAA ↓ IS <sup>150</sup>   | AGDQSIGD ↓ LI <sup>160</sup>                                                                                                                                                                                                    | AE ↓ A ↓ MDKVGNE <sup>170</sup> | GVITVEESNT <sup>180</sup>    | FG ↓ LQLELTEG <sup>190</sup> ↓ | MRFDKGYISG <sup>200</sup> ↓  | YFVTDPERQE <sup>210</sup>       |          |       |
| AVLEDPYI ↓ LL <sup>220</sup> ↓ | VSSKVST ↓ VKD <sup>230</sup> ↓                                                                                                                                                                                                  | LLP ↓ LLEKVI <sup>240</sup>     | AGKPLL ↓ IIAE <sup>250</sup> | DVEGEALSTL <sup>260</sup>      | VVNKIRGTFK <sup>270</sup>    | SVAVKAPGFG <sup>280</sup>       |          |       |
| DRRKAMLQD ↓ M <sup>290</sup>   | AILTGGQVIS <sup>300</sup>                                                                                                                                                                                                       | EEVGLTLENA <sup>310</sup>       | DLS ↓ LLGKAR <sup>320</sup>  | VVVTKDETTI <sup>330</sup>      | VEGAGDTDAI <sup>340</sup>    | AGRVAQ ↓ IRQE <sup>350</sup>    |          |       |
| IENSDDSDYDR <sup>360</sup>     | EKLQERLAK ↓ L <sup>370</sup>                                                                                                                                                                                                    | AGG ↓ VAVIKAG <sup>380</sup>    | A ↓ ATEVELKER <sup>390</sup> | KHRIEDAVRN <sup>400</sup>      | AKAAVEEGIV <sup>410</sup>    | AGGGVTL ↓ LQA <sup>420</sup>    |          |       |
| APTLDELK ↓ LE <sup>430</sup>   | GDEATGAN ↓ IV <sup>440</sup>                                                                                                                                                                                                    | KVALEAP ↓ LK ↓ Q <sup>450</sup> | IAFNNGLEPG <sup>460</sup>    | VVAEKVRNLP <sup>470</sup>      | AGHGLNA ↓ QTG <sup>480</sup> | VYEDL ↓ LAAG ↓ V <sup>490</sup> |          |       |
| ADP ↓ VKVTRSA <sup>500</sup>   | LQNAASIAG ↓ L <sup>510</sup>                                                                                                                                                                                                    | FLTTEAVVAD <sup>520</sup>       | KPEKEKASVP <sup>530</sup>    | GGGDMGGMDF <sup>540</sup>      |                              |                                 |          |       |
| Peptide sequences              |                                                                                                                                                                                                                                 |                                 |                              |                                |                              | Molecular mass, Da              |          |       |
|                                |                                                                                                                                                                                                                                 |                                 |                              |                                |                              | Calculated                      | Measured |       |
| 1                              | <sup>201</sup> YFVTDPERQEAVLEDPYILLVSSKVS <sup>230</sup> TVKDLLP <sup>246</sup> LLEKVI <sup>260</sup> GAGKPLLI <sup>277</sup> IAEDVEGEALSTLVVNKIRGTFKSVAVKAPGFGDRRKAMLQDMA <sup>313</sup> ILTGGQVISEEVGLTLENADLS <sup>313</sup> |                                 |                              |                                |                              |                                 | 12146    | 12152 |
| 2                              | <sup>163</sup> AMDKVGNEGVITVEESNTFGLQLELTEGMRFKGYISGYFVTDPERQEAVLEDPYILLVSSKVS <sup>233</sup> TVKDLLP <sup>246</sup> LLEKVI <sup>260</sup> GAGKPLL <sup>246</sup>                                                               |                                 |                              |                                |                              |                                 | 9211     | 9214  |
| 3                              | <sup>290</sup> MAILTGGQVISEEVGLTLENADLSLLGKARKVVVTKDETTIVEGAGDTDAIAGRVAQIRQEIENSDDSDYDREKLQERLAK <sup>369</sup>                                                                                                                 |                                 |                              |                                |                              |                                 | 8638     | 8643  |
| 4                              | <sup>149</sup> ISAGDQSIGDLIAEAMDKVGNEGVITVEESNTFGLQLELTEGMRFKGYISGYFVTDPERQEAVLEDPYILLVSSKVS <sup>227</sup>                                                                                                                     |                                 |                              |                                |                              |                                 | 8583     | 8584  |
| 5                              | <sup>163</sup> AMDKVGNEGVITVEESNTFGLQLELTEGMRFKGYISGYFVTDPERQEAVLEDPYILLVSSKVS <sup>233</sup> TVKDLLP <sup>233</sup>                                                                                                            |                                 |                              |                                |                              |                                 | 7878     | 7877  |
| 6                              | <sup>159</sup> IAEAMDKVGNEGVITVEESNTFGLQLELTEGMRFKGYISGYFVTDPERQEAVLEDPYILLVSSKVS <sup>227</sup>                                                                                                                                |                                 |                              |                                |                              |                                 | 7640     | 7642  |
| 7                              | <sup>374</sup> VAVIKAGAATEVELKERKHRIEDAVRNAKAAVEEGIVAGGGVTL <sup>428</sup> LQAAPTLDELKLEGDEATGANIVKVALEAP <sup>447</sup>                                                                                                        |                                 |                              |                                |                              |                                 | 7582     | 7581  |
| 8                              | <sup>418</sup> LQAAPTLDELKLEGDEATGANIVKVALEAPLKQIAFNNGLEPGVVAEKVRNLPAGHGLNAQTGVYEDLLAAG <sup>489</sup>                                                                                                                          |                                 |                              |                                |                              |                                 | 7374     | 7383  |
| 9                              | <sup>164</sup> MDKVGNEGVITVEESNTFGLQLELTEGMRFKGYISGYFVTDPERQEAVLEDPYI <sup>218</sup>                                                                                                                                            |                                 |                              |                                |                              |                                 | 6228     | 6234  |
| 10                             | <sup>450</sup> QIAFNNGLEPGVVAEKVRNLPAGHGLNAQTGVYEDLLAAGVADPVKVTRSA <sup>509</sup> LQNAASIAG <sup>509</sup>                                                                                                                      |                                 |                              |                                |                              |                                 | 6024     | 6026  |
| 11                             | <sup>290</sup> MAILTGGQVISEEVGLTLENADLSLLGKARKVVVTKDETTIVEGAGDTDAIAGRVAQ <sup>346</sup>                                                                                                                                         |                                 |                              |                                |                              |                                 | 5822     | 5823  |
| 12                             | <sup>374</sup> VAVIKAGAATEVELKERKHRIEDAVRNAKAAVEEGIVAGGGVTL <sup>428</sup> LQAAPTLDELK <sup>428</sup>                                                                                                                           |                                 |                              |                                |                              |                                 | 5704     | 5698  |
| 13                             | <sup>486</sup> LAAGVADPVKVTRSA <sup>540</sup> LQNAASIAGFLTTEAVVADKPEKEKASVPGGGDMGGMDF <sup>540</sup>                                                                                                                            |                                 |                              |                                |                              |                                 | 5457     | 5452  |
| 14                             | <sup>439</sup> IVKVALEAPLKQIAFNNGLEPGVVAEKVRNLPAGHGLNAQTGVYEDLLAAG <sup>489</sup>                                                                                                                                               |                                 |                              |                                |                              |                                 | 5237     | 5233  |
| 15                             | <sup>382</sup> ATEVELKERKHRIEDAVRNAKAAVEEGIVAGGGVTL <sup>428</sup> LQAAPTLDELK <sup>428</sup>                                                                                                                                   |                                 |                              |                                |                              |                                 | 4995     | 4993  |
| 16                             | <sup>494</sup> VKVTRSA <sup>540</sup> LQNAASIAGFLTTEAVVADKPEKEKASVPGGGDMGGMDF <sup>540</sup>                                                                                                                                    |                                 |                              |                                |                              |                                 | 4762     | 4761  |
| 17                             | <sup>191</sup> MRFDKGYISGYFVTDPERQEAVLEDPYILLVSSKVS <sup>230</sup> TVK <sup>230</sup>                                                                                                                                           |                                 |                              |                                |                              |                                 | 4594     | 4592  |
| 18                             | <sup>183</sup> LQLELTEGMRFKGYISGYFVTDPERQEAVLEDPYILL <sup>220</sup>                                                                                                                                                             |                                 |                              |                                |                              |                                 | 4447     | 4455  |
| 19                             | <sup>478</sup> QTGVYEDLLAAGVADPVKVTRSA <sup>509</sup> LQNAASIAG <sup>509</sup>                                                                                                                                                  |                                 |                              |                                |                              |                                 | 3185     | 3185  |

MMP-24 fragments

|                              |                              |                              |                              |                              |                              |                                 |
|------------------------------|------------------------------|------------------------------|------------------------------|------------------------------|------------------------------|---------------------------------|
| MAKTIAYDEE <sup>10</sup>     | ARRGLERGLN <sup>20</sup>     | ALADAVKVTI <sup>30</sup>     | GPKGRNVVLE <sup>40</sup>     | KKWGAPTITN <sup>50</sup>     | DGVSIAKEIE <sup>60</sup>     | LEDPYEKIGA <sup>70</sup>        |
| ELVKEVAKKT <sup>80</sup>     | DDVAGDGT <sup>90</sup>       | ATVLAQALVR <sup>100</sup>    | EGLRNVAAGA <sup>110</sup>    | NPLGLKRGIE <sup>120</sup>    | KAVEKVTETI <sup>130</sup>    | LKGAKEVETK <sup>140</sup>       |
| EQIAATAA ↓ IS <sup>150</sup> | AGD ↓ QSIGDLI <sup>160</sup> | AEAMDKVGN <sup>170</sup>     | GVITVEESNT <sup>180</sup>    | FGLQ ↓ LELTEG <sup>190</sup> | MRFDKGYISG <sup>200</sup>    | Y ↓ FVTDPER ↓ QE <sup>210</sup> |
| AVLEDPYILL <sup>220</sup>    | VSSKVSTVKD <sup>230</sup>    | LLPILLEKVI <sup>240</sup>    | AGKPLIIIAE <sup>250</sup>    | DVEGEALST ↓ L <sup>260</sup> | VVNKIRGTFK <sup>270</sup>    | SVAVKAPGFG <sup>280</sup>       |
| DRRKAMLQD ↓ M <sup>290</sup> | AILTGGQVIS <sup>300</sup>    | EEVGLTLENA <sup>310</sup>    | DLSSLGKARK <sup>320</sup>    | VVVTKDETTI <sup>330</sup>    | VEGAGDTDAI <sup>340</sup>    | AGRVAQIRQE <sup>350</sup>       |
| IENSDSDYDR <sup>360</sup>    | EKLQERLAKL <sup>370</sup>    | AGG ↓ VAVIKAG <sup>380</sup> | A ↓ ATEVELKER <sup>390</sup> | KHRIEDAVRN <sup>400</sup>    | AKA ↓ AVEEGIV <sup>410</sup> | AGGGVTLLQA <sup>420</sup>       |
| APTLDELK ↓ LE <sup>430</sup> | GDEATGANIV <sup>440</sup>    | KVALEAPLKQ <sup>450</sup> ↓  | IAFNNGLEPG <sup>460</sup>    | VVAEKVRNLP <sup>470</sup>    | AGHG ↓ LNAQTG <sup>480</sup> | VYEDLLAAGV <sup>490</sup>       |
| ADPVKVTRSA <sup>500</sup> ↓  | LQNAASIAGL <sup>510</sup>    | FLTTEAVVAD <sup>520</sup>    | KPEKEKASVP <sup>530</sup>    | GGGDMGGMDF <sup>540</sup>    |                              |                                 |

| Peptide sequences |                                                                                                                                                                                                                                                 | Molecular mass, Da |          |
|-------------------|-------------------------------------------------------------------------------------------------------------------------------------------------------------------------------------------------------------------------------------------------|--------------------|----------|
|                   |                                                                                                                                                                                                                                                 | Calculated         | Measured |
| 1                 | <sup>149</sup> ISAGDQSIGDLIAEAMDKVGN <sup>259</sup> GVITVEESNTFGLQLELTEGMRFDKGYISGYFVTDPERQEAVLEDPYILLVSSKVSTVKDLLPILLEKVI<br>GKPLIIIAEDVEGEALSTLVVNKIRGTFKSVAVKAPGFGDRRKAMLQD <sup>289</sup>                                                   | 15191              | 15189    |
| 2                 | <sup>185</sup> LELTEGMRFDKGYISGYFVTDPERQEAVLEDPYILLVSSKVSTVKDLLPILLEKVI<br>GAGKPLIIIAEDVEGEALSTLVVNKIRGTFKSVAVKAPGFGDRRKAMLQD <sup>289</sup>                                                                                                    | 11502              | 11505    |
| 3                 | <sup>374</sup> VKAPGFGDRRKAMLQDMAILTGGQVISEEVGLTLENADLSLLGKARKVVVTKDETTIVEGAGDTDAIAGRVAQIRQEIENSDSDYDREKLQER<br>LAKLAGGVAVIKAGAATEVELKERKHRIEDAVRNAKAAVEEGIVAGGGVTLLQAAPTLDELKLEGDEATGANIVKVALEAPLKQIAFNNGLEPGV<br>VAEKVRNLPAGHG <sup>474</sup> | 10364              | 10373    |
| 4                 | <sup>209</sup> QEAVLEDPYILLVSSKVSTVKDLLPILLEKVI<br>GAGKPLIIIAEDVEGEALST <sup>259</sup>                                                                                                                                                          | 5415               | 5416     |
| 5                 | <sup>154</sup> QSIGDLIAEAMDKVGN <sup>259</sup> GVITVEESNTFGLQLELTEGMRFDKGYISGY <sup>201</sup>                                                                                                                                                   | 5223               | 5224     |
| 6                 | <sup>382</sup> ATEVELKERKHRIEDAVRNAKAAVEEGIVAGGGVTLLQAAPTLDELK <sup>428</sup>                                                                                                                                                                   | 4995               | 4998     |
| 7                 | <sup>404</sup> AVEEGIVAGGGVTLLQAAPTLDELKLEGDEATGANIVKVALEAPLKQ <sup>450</sup>                                                                                                                                                                   | 4697               | 4694     |
| 8                 | <sup>501</sup> LQNAASIAGLFLTTEAVVADKPEKEKASVPGGGDMGGMDF <sup>540</sup>                                                                                                                                                                          | 4021               | 4021     |

MMP-25 fragments

|                                |                                 |                                 |                                |                              |                              |                                 |
|--------------------------------|---------------------------------|---------------------------------|--------------------------------|------------------------------|------------------------------|---------------------------------|
| MAKT ↓ IAYDEE <sup>10</sup>    | ARRGLERGLN <sup>20</sup>        | ALADAVK ↓ VTL <sup>30</sup>     | GPKGRNVVLE <sup>40</sup>       | KKWGAPTITN <sup>50</sup>     | DGVSIKE ↓ IE <sup>60</sup>   | LEDPYEKIGA <sup>70</sup>        |
| E ↓ L ↓ VKEVAKKT <sup>80</sup> | DDVAGDGT <sup>90</sup>          | ATVLA ↓ QALVR <sup>100</sup>    | EGLRNVA ↓ GA <sup>110</sup>    | NPLGLKRGIE <sup>120</sup>    | KAVEK ↓ VTETL <sup>130</sup> | LKGAKEVETK <sup>140</sup>       |
| EQIAATAA ↓ IS <sup>150</sup>   | AGD ↓ QSIGD ↓ LI <sup>160</sup> | AEA ↓ MDKVGNE <sup>170</sup>    | GVITVEESNT <sup>180</sup>      | FGLQLELTEG <sup>190</sup> ↓  | MRFDKGYISG <sup>200</sup>    | Y ↓ FVTDPER ↓ QE <sup>210</sup> |
| AVLEDPYIL ↓ L <sup>220</sup>   | VSSKVVSTVKD <sup>230</sup>      | LLP ↓ LLEKVI <sup>240</sup>     | AGKPLL ↓ IIAE <sup>250</sup> ↓ | VEGEALST ↓ L <sup>260</sup>  | VVNKIRGTFK <sup>270</sup>    | SVAVKAPGFG <sup>280</sup>       |
| DRRKAMLQD ↓ M <sup>290</sup>   | AILTGGQVIS <sup>300</sup>       | EEVGLT ↓ LENA <sup>310</sup>    | DLSELLGKARK <sup>320</sup> ↓   | VVVTKDETTI <sup>330</sup>    | VEGAGDTDAI <sup>340</sup>    | AGRVAQ ↓ IRQE <sup>350</sup>    |
| IENSDDSDYDR <sup>360</sup>     | EKLQERLAKL <sup>370</sup>       | AGG ↓ VAV ↓ IKAG <sup>380</sup> | AATEVELKER <sup>390</sup>      | KHRIEDAVRN <sup>400</sup> ↓  | AKA ↓ AVEEGIV <sup>410</sup> | AGGGVTL ↓ LQA <sup>420</sup>    |
| APTLDELKLE <sup>430</sup>      | GDEATGANIV <sup>440</sup>       | KVALEAP ↓ LKQ <sup>450</sup> ↓  | IAFNGLPEP <sup>460</sup>       | VVAEK ↓ VRNLP <sup>470</sup> | AG ↓ HGLNAQTG <sup>480</sup> | VYED ↓ LLAAG ↓ V <sup>490</sup> |
| ADPVKVTRSA <sup>500</sup>      | LQNAASIAG ↓ L <sup>510</sup> ↓  | FLTTEAVVAD <sup>520</sup>       | KPEKEKASVP <sup>530</sup>      | GGGDMGGMDF <sup>540</sup>    |                              |                                 |

| Peptide sequences |                                                                                                                                   | Molecular mass, Da |          |
|-------------------|-----------------------------------------------------------------------------------------------------------------------------------|--------------------|----------|
|                   |                                                                                                                                   | Calculated         | Measured |
| 1                 | <sup>321</sup> VVVTKDETTIVEGAGDTDAIAGRVAQIRQEIENSDDSDYDREKLQERLAKLAGGVAVIKAGAAATEVELKERKHRIEDAVRNAKAAVEEGIVAGGGVTL <sup>417</sup> | 10235              | 10238    |
| 2                 | <sup>377</sup> IKAGAAATEVELKERKHRIEDAVRNAKAAVEEGIVAGGGVTLQAAPTLDELKLEGDEATGANIVKVALEAPLKQIAFNGLPEPVGVAEK <sup>465</sup>           | 9194               | 9188     |
| 3                 | <sup>321</sup> VVVTKDETTIVEGAGDTDAIAGRVAQIRQEIENSDDSDYDREKLQERLAKLAGGVAVIKAGAAATEVELKERKHRIEDAVRN <sup>400</sup>                  | 8713               | 8712     |
| 4                 | <sup>247</sup> IIAEDVEGEALSTLVVNKIRGTFKSVAVKAPGFGDRRKAMLQDMAILTGGQVISEEVGLTLENADLSLLGKARK <sup>320</sup>                          | 7836               | 7835     |
| 5                 | <sup>466</sup> VRNLPAGHGLNAQTGVYEDLLAAGVADPVKVTRSAALQNAASIALGLTTEAVVADKPEKEKASVPGGGDMGGMDF <sup>540</sup>                         | 7562               | 7565     |
| 6                 | <sup>220</sup> LVSSKVVSTVKDLLPILLEKVIAGAGKPLLI AEDVEGEALSTLVVNKIRGTFKSVAVKAPGFGDRRKAMLQD <sup>289</sup>                           | 7427               | 7429     |
| 7                 | <sup>5</sup> IAYDEEARRGLERGLNALADAVKVTLGPKGRNVVLEKKKWGAPTITNDGVSIKEIELEDPYEKIGAEL <sup>72</sup>                                   | 7388               | 7386     |
| 8                 | <sup>307</sup> LENADLSLLGKARKVVVTKDETTIVEGAGDTDAIAGRVAQIRQEIENSDDSDYDREKLQERLAKLAGG <sup>373</sup>                                | 7238               | 7239     |
| 9                 | <sup>401</sup> AKAAVEEGIVAGGGVTLQAAPTLDELKLEGDEATGANIVKVALEAPLKQIAFNGLPEPVGVAEKVRNLPAG <sup>472</sup>                             | 7187               | 7188     |
| 10                | <sup>28</sup> VTLGPKGRNVVLEKKKWGAPTITNDGVSIKEIELEDPYEKIGAELVKEVAKKTDDVAGDGT <sup>95</sup>                                         | 7147               | 7140     |
| 11                | <sup>59</sup> IELEDPYEKIGAELVKEVAKKTDDVAGDGT <sup>125</sup>                                                                       | 7028               | 7021     |
| 12                | <sup>448</sup> LKQIAFNGLPEPVGVAEKVRNLPAGHGLNAQTGVYEDLLAAGVADPVKVTRSAALQNAASIALG <sup>510</sup>                                    | 6378               | 6374     |
| 13                | <sup>347</sup> IRQEIENSDDSDYDREKLQERLAKLAGGVAVIKAGAAATEVELKERKHRIEDAVRN <sup>400</sup>                                            | 6116               | 6112     |
| 14                | <sup>234</sup> LLEKVIAGAGKPLLI AEDVEGEALSTLVVNKIRGTFKSVAVKAPGFGDRRKAMLQD <sup>289</sup>                                           | 5960               | 5964     |
| 15                | <sup>252</sup> VEGEALSTLVVNKIRGTFKSVAVKAPGFGDRRKAMLQDMAILTGGQVISEEVGLT <sup>306</sup>                                             | 5786               | 5785     |
| 16                | <sup>418</sup> LQAAPTLDELKLEGDEATGANIVKVALEAPLKQIAFNGLPEPVGVAEKVRNLPAG <sup>472</sup>                                             | 5664               | 5660     |
| 17                | <sup>485</sup> LLAAGVADPVKVTRSAALQNAASIALGLTTEAVVADKPEKEKASVPGGGDMGGMDF <sup>540</sup>                                            | 5570               | 5577     |
| 18                | <sup>202</sup> VAVIKAGAAATEVELKERKHRIEDAVRNAKAAVEEGIVAGGGVTLQAAPTLDE <sup>251</sup>                                               | 5472               | 5470     |
| 19                | <sup>209</sup> QEAILEDYILLVSSKVVSTVKDLLPILLEKVIAGAGKPLLI AEDVEGEALST <sup>259</sup>                                               | 5415               | 5415     |
| 20                | <sup>154</sup> QSIGDLIAEAMDKVNEGVIITVEESNTFGLQLELTEGMRFDKGYISGY <sup>201</sup>                                                    | 5223               | 5227     |
| 21                | <sup>164</sup> MDKVGNEGVIITVEESNTFGLQLELTEGMRFDKGYISGYFVTDPER <sup>208</sup>                                                      | 5070               | 5062     |
| 22                | <sup>191</sup> MRFDKGYISGYFVTDPERQEAILEDYILLVSSKVVSTVKDLLP <sup>233</sup>                                                         | 4917               | 4910     |
| 23                | <sup>159</sup> LIAEAMDKVNEGVIITVEESNTFGLQLELTEGMRFDKGYISGY <sup>201</sup>                                                         | 4723               | 4728     |
| 24                | <sup>404</sup> AVEEGIVAGGGVTLQAAPTLDELKLEGDEATGANIVKVALEAPLKQ <sup>450</sup>                                                      | 4697               | 4690     |

|    |                                                                            |      |      |
|----|----------------------------------------------------------------------------|------|------|
| 25 | <sup>374</sup> VAVIKAGAATEVELKERKHRIEDAVRNAKAAVEEGIVAGGGVTL <sup>417</sup> | 4524 | 4527 |
| 26 | <sup>466</sup> VRNLPAGHGLNAQTGVYEDLLAAGVADPVKVTRSAIQNAASIAG <sup>509</sup> | 4384 | 4394 |
| 27 | <sup>448</sup> LKQIAFNGLPGVVAEKVRNLPAGHGLNAQTGVYEDLLAAG <sup>489</sup>     | 4316 | 4309 |
| 28 | <sup>109</sup> GANPLGLKRGIEKAVEKVTETLLKGAKEVETKEQIAATAA <sup>148</sup>     | 4161 | 4166 |
| 29 | <sup>209</sup> QEAVLEDPYILLVSSKVSTVKDLLPLEKVIKAGKPLL <sup>246</sup>        | 4087 | 4084 |

**Supplemental Table S2.** The P1' residue positions in the HSP65 cleavage peptides. PEX, hemopexin.

| Residue | Gelatinases, MMPs |    | Simple PEX domain MMP | Membrane-associated MMPs |     |     |     | GPI-linked MMPs |     |
|---------|-------------------|----|-----------------------|--------------------------|-----|-----|-----|-----------------|-----|
|         | -2                | -9 | -8                    | -14                      | -15 | -16 | -24 | -17             | -25 |
| Ala     | 3                 | 1  | 2                     | 4                        | 2   | 3   | 2   | 2               | 2   |
| Val     | 9                 | 11 | 11                    | 7                        | 5   | 6   | 1   | 5               | 8   |
| Leu     | 8                 | 12 | 17                    | 11                       | 9   | 10  | 5   | 12              | 9   |
| Ile     | 2                 | 0  | 3                     | 1                        | 4   | 4   | 2   | 4               | 6   |
| Phe     | 1                 | 2  | 2                     | 1                        | 0   | 1   | 1   | 0               | 2   |
| Tyr     | 0                 | 0  | 0                     | 0                        | 0   | 0   | 0   | 1               | 0   |
| Met     | 0                 | 4  | 4                     | 2                        | 1   | 3   | 1   | 3               | 3   |
| Gln     | 2                 | 3  | 4                     | 0                        | 4   | 4   | 2   | 2               | 3   |
| Gly     | 1                 | 2  | 2                     | 0                        | 1   | 1   | 0   | 0               | 1   |
| Glu     | 1                 | 0  | 0                     | 0                        | 0   | 0   | 0   | 0               | 0   |
| Lys     | 0                 | 0  | 0                     | 1                        | 0   | 0   | 0   | 0               | 0   |
| His     | 0                 | 0  | 0                     | 1                        | 1   | 1   | 0   | 0               | 1   |

**Supplemental Table S3.** The P1 residue positions in the HSP65 cleavage peptides. PEX, hemopexin.

| Residue | Gelatinases, MMPs |    | Simple PEX domain MMP | Membrane-associated MMPs |     |     |     | GPI-linked MMPs |     |
|---------|-------------------|----|-----------------------|--------------------------|-----|-----|-----|-----------------|-----|
|         | -2                | -9 | -8                    | -14                      | -15 | -16 | -24 | -17             | -25 |
| Ala     | 3                 | 4  | 5                     | 4                        | 6   | 6   | 3   | 4               | 5   |
| Val     | 1                 | 0  | 1                     | 0                        | 1   | 1   | 0   | 0               | 1   |
| Leu     | 5                 | 4  | 5                     | 3                        | 1   | 1   | 0   | 4               | 5   |
| Ile     | 0                 | 0  | 0                     | 0                        | 0   | 0   | 0   | 1               | 0   |
| Phe     | 0                 | 1  | 1                     | 0                        | 1   | 0   | 0   | 0               | 0   |
| Tyr     | 1                 | 1  | 1                     | 1                        | 0   | 0   | 1   | 0               | 1   |
| Met     | 0                 | 0  | 0                     | 1                        | 0   | 0   | 0   | 0               | 0   |
| Gln     | 2                 | 1  | 1                     | 0                        | 0   | 1   | 2   | 1               | 2   |
| Gly     | 2                 | 6  | 6                     | 5                        | 2   | 4   | 2   | 6               | 5   |
| Glu     | 1                 | 1  | 2                     | 2                        | 1   | 1   | 0   | 1               | 1   |
| Asp     | 3                 | 3  | 6                     | 4                        | 3   | 5   | 2   | 3               | 5   |
| Asn     | 1                 | 1  | 3                     | 2                        | 2   | 2   | 0   | 1               | 1   |
| Lys     | 5                 | 8  | 6                     | 3                        | 3   | 3   | 1   | 3               | 4   |
| Arg     | 0                 | 2  | 2                     | 0                        | 1   | 1   | 1   | 0               | 1   |
| His     | 0                 | 1  | 1                     | 0                        | 1   | 1   | 0   | 0               | 0   |
| Ser     | 0                 | 0  | 0                     | 1                        | 1   | 2   | 0   | 1               | 0   |
| Thr     | 1                 | 1  | 1                     | 1                        | 1   | 2   | 1   | 1               | 3   |
| Pro     | 1                 | 2  | 3                     | 1                        | 2   | 2   | 0   | 3               | 2   |



**Supplemental Table S4.** The P2 residue positions in the HSP65 cleavage peptides. PEX, hemopexin.

| Residue | Gelatinases, MMPs |    | Simple PEX domain MMP | Membrane-associated MMPs |     |     |     | GPI-linked MMPs |     |
|---------|-------------------|----|-----------------------|--------------------------|-----|-----|-----|-----------------|-----|
|         | -2                | -9 | -8                    | -14                      | -15 | -16 | -24 | -17             | -25 |
| Ala     | 3                 | 4  | 9                     | 6                        | 5   | 5   | 1   | 8               | 8   |
| Val     | 2                 | 2  | 1                     | 1                        | 1   | 0   | 0   | 0               | 1   |
| Leu     | 6                 | 5  | 7                     | 1                        | 3   | 3   | 2   | 6               | 4   |
| Ile     | 0                 | 0  | 1                     | 0                        | 1   | 0   | 0   | 0               | 1   |
| Phe     | 1                 | 0  | 0                     | 0                        | 1   | 0   | 0   | 1               | 0   |
| Tyr     | 0                 | 0  | 0                     | 1                        | 0   | 0   | 0   | 1               | 0   |
| Gln     | 0                 | 1  | 2                     | 1                        | 2   | 2   | 1   | 1               | 1   |
| Gly     | 3                 | 7  | 8                     | 2                        | 2   | 5   | 4   | 3               | 5   |
| Glu     | 4                 | 4  | 8                     | 5                        | 3   | 6   | 1   | 2               | 7   |
| Asp     | 1                 | 1  | 1                     | 1                        | 2   | 2   | 0   | 2               | 0   |
| Asn     | 0                 | 0  | 1                     | 1                        | 2   | 2   | 0   | 1               | 0   |
| Lys     | 1                 | 0  | 1                     | 2                        | 2   | 4   | 2   | 1               | 4   |
| Arg     | 1                 | 2  | 4                     | 3                        | 1   | 1   | 0   | 0               | 2   |
| His     | 0                 | 0  | 0                     | 1                        | 0   | 0   | 1   | 0               | 0   |
| Ser     | 2                 | 1  | 1                     | 2                        | 1   | 2   | 2   | 2               | 1   |
| Thr     | 2                 | 1  | 1                     | 1                        | 0   | 0   | 0   | 1               | 1   |

**Supplemental Table S5.** The P3 residue positions in the HSP65 cleavage peptides. PEX, hemopexin.

| Residue | Gelatinases,<br>MMPs |    | Simple PEX<br>domain MMP | Membrane-<br>associated MMPs |     |     |     | GPI-linked<br>MMPs |     |
|---------|----------------------|----|--------------------------|------------------------------|-----|-----|-----|--------------------|-----|
|         | -2                   | -9 | -8                       | -14                          | -15 | -16 | -24 | -17                | -25 |
| Ala     | 6                    | 11 | 14                       | 4                            | 10  | 12  | 4   | 5                  | 13  |
| Val     | 5                    | 3  | 8                        | 5                            | 3   | 5   | 0   | 4                  | 7   |
| Leu     | 3                    | 5  | 4                        | 3                            | 5   | 6   | 3   | 4                  | 4   |
| Ile     | 2                    | 3  | 4                        | 2                            | 0   | 1   | 0   | 5                  | 2   |
| Phe     | 0                    | 0  | 0                        | 0                            | 0   | 0   | 0   | 0                  | 0   |
| Tyr     | 1                    | 0  | 2                        | 1                            | 1   | 1   | 0   | 0                  | 2   |
| Met     | 0                    | 1  | 1                        | 0                            | 0   | 1   | 0   | 0                  | 0   |
| Gly     | 2                    | 11 | 4                        | 1                            | 3   | 2   | 2   | 1                  | 1   |
| Glu     | 0                    | 11 | 1                        | 2                            | 0   | 1   | 1   | 3                  | 1   |
| Asp     | 0                    | 0  | 0                        | 0                            | 0   | 1   | 0   | 1                  | 0   |
| Asn     | 0                    | 1  | 1                        | 0                            | 0   | 0   | 0   | 0                  | 0   |
| Lys     | 0                    | 0  | 0                        | 1                            | 0   | 0   | 0   | 0                  | 0   |
| Arg     | 0                    | 0  | 0                        | 1                            | 0   | 0   | 1   | 0                  | 0   |
| Ser     | 1                    | 1  | 1                        | 1                            | 0   | 0   | 1   | 0                  | 1   |
| Thr     | 2                    | 1  | 2                        | 3                            | 2   | 0   | 1   | 3                  | 2   |
| Pro     | 4                    | 4  | 2                        | 4                            | 2   | 2   | 1   | 3                  | 3   |
